# Supplementary material
Source: publisher figshare collection journal article supplement (https://acs.figshare.com/ndownloader/files/4770121)

# Supporting Information

## An In-depth Study on Ring-closing Metathesis of Carbohydrate-derived $\alpha$ -Alkoxyacrylates: Efficient Syntheses of DAH, KDO and 2-Deoxy- $\beta$ -KDO

*Koen F. W. Hekking, Marcel A. H. Moelands, Floris L. Van Delft and Floris P. J. T. Rutjes\**

Institute for Molecules and Materials, Radboud University Nijmegen, Toernooiveld 1, NL-6525 ED Nijmegen, The Netherlands.

Email: F.Rutjes@science.ru.nl

### Contents

|                                                                                                 |        |
|-------------------------------------------------------------------------------------------------|--------|
| General experimental information                                                                | S2     |
| Compounds <b>4a/b</b>                                                                           | S2     |
| General procedure A for the preparation of $\alpha$ -alkoxyacrylates                            | S2     |
| Compounds <b>9, 10, 13-16, 21-24</b>                                                            | S2-S4  |
| Compounds <b>36-37</b>                                                                          | S4     |
| References for experimental section                                                             | S4-S5  |
| <sup>1</sup> H-NMR spectra for <b>1, 2.NH<sub>3</sub>, 13-16, 25-30, 32, 33, 36, 38, 39, 41</b> | S6-S16 |

## General experimental information

All reactions with air- or moisture-sensitive compounds were performed under an inert atmosphere. Nitrogen and argon were dried over Sicapent,  $\text{CaCl}_2$  and KOH.  $\text{CH}_2\text{Cl}_2$  was distilled over  $\text{CaH}_2$ . THF and  $\text{Et}_2\text{O}$  were distilled over Na. Acetonitrile was distilled and stored on molecular sieves (4 Å). Toluene was distilled over  $\text{CaH}_2$  and deoxygenated using the freeze-pump-thaw method.  $\text{Et}_3\text{N}$  was distilled and stored over KOH. All other chemicals were purchased from commercial suppliers and used without further purification. Column chromatography was performed using silica gel (230-400 mesh, 60 Å).  $^1\text{H}$  and  $^{13}\text{C}$ -NMR spectra were recorded on a 200, 300 or 400 MHz spectrometer. Spectra are reported in units of ppm on the  $\delta$  scale, relative to chloroform (7.25 ppm for  $^1\text{H}$ -NMR and 77.0 ppm for  $^{13}\text{C}$ -NMR). IR measurements were performed on an FTIR spectrometer. 2-Vinylphenol<sup>1</sup> was prepared by a Wittig olefination of salicyl aldehyde, using  $\text{Ph}_3\text{P}=\text{CH}_2$ .

### Methyl 2-bromo-3-(pyrrolidin-1-yl)propanoate (4a)

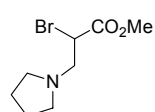

A solution of methyl 2,3-dibromopropanoate (2.01 g, 8.17 mmol) in toluene (130 mL) was cooled to 0 °C and pyrrolidine (0.68 mL, 8.05 mmol) and  $\text{Et}_3\text{N}$  (1.15 mL, 8.17 mmol) were added. After stirring at 0 °C for 1 h, the resulting suspension was filtered over Celite, washed with  $\text{H}_2\text{O}$  (25 mL), dried ( $\text{MgSO}_4$ ) and concentrated. The resulting crude product was >95% pure according to NMR and therefore directly used in the next step. The yield was 1.72 g (89%). The analytical data were in agreement with those reported earlier.<sup>2</sup>  $^1\text{H}$ -NMR ( $\text{CDCl}_3$ , 200 MHz):  $\delta$  4.33 (dd,  $J$  = 6.0, 9.2 Hz, 1H), 3.88 (s, 3H), 3.30 (dd,  $J$  = 9.2, 12.9 Hz, 1H), 2.95 (dd,  $J$  = 6.0, 12.9 Hz, 1H), 2.72 (m, 4H), 1.84 (m, 4H).  $^{13}\text{C}$ -NMR ( $\text{CDCl}_3$ , 300 MHz):  $\delta$  169.5, 59.3, 58.2, 54.1, 43.0, 23.6.

### Ethyl 2-bromo-3-(pyrrolidin-1-yl)propanoate (4b)

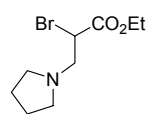

The same procedure was applied as for **4a**, using ethyl 2,3-dibromopropanoate. The crude yield was 1.77 g (92%).  $^1\text{H}$  NMR ( $\text{CDCl}_3$ , 200 MHz):  $\delta$  4.38-4.26 (m, 3H), 3.28 (dd,  $J$  = 9.2, 12.7 Hz, 1H), 2.95 (dd,  $J$  = 6.0, 12.7 Hz, 1H), 2.62 (m, 4H), 1.76 (m, 4H), 1.37 (t,  $J$  = 7.0 Hz, 3H).  $^{13}\text{C}$  NMR ( $\text{CDCl}_3$ , 75 MHz):  $\delta$  169.4, 61.8, 59.3, 54.1, 43.0, 23.6, 13.9.

## General procedure A for the preparation of $\alpha$ -alkoxyacrylates

To a cooled (0 °C) solution of the alcohol (1 equiv) in diethyl ether/DMF (1:1, 0.05M) was added NaH (60% in mineral oil; 2.5 equiv) and the mixture was stirred at 40 °C for 1 h. After cooling to room temperature, freshly prepared **4a** or **b** (3.5 equiv) was added and the reaction was stirred for 18 h. Next,  $\text{H}_2\text{O}$  was added, the mixture was extracted with diethyl ether (3  $\times$ ) and the combined organic layers were concentrated *in vacuo*. The residue was dissolved in (m)ethanol/MeCN (1:1, 0.1M), MeI (10 equiv) and  $\text{Na}_2\text{CO}_3$  (5 equiv) were added and the reaction mixture was allowed to stir at reflux temperature for 48 h. Next,  $\text{H}_2\text{O}$  was added and the mixture was extracted with  $\text{CH}_2\text{Cl}_2$  (3  $\times$ ). The combined organic layers were dried with  $\text{MgSO}_4$ , concentrated and the product was isolated by column chromatography (EtOAc/heptane, 1:6).

### Methyl 2-phenoxyacrylate (9)

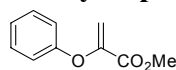

This compound was prepared from phenol according to general procedure A. The yield was 62 mg (55%). Analytical data agreed with those reported in literature.<sup>3</sup>  $^1\text{H}$ -NMR ( $\text{CDCl}_3$ , 300 MHz):  $\delta$  7.32-7.05 (m, 5H), 5.69 (d,  $J$  = 2.0 Hz, 1H), 4.88 (d,  $J$  = 2.0 Hz, 1H), 3.83 (s, 3H).  $^{13}\text{C}$ -NMR ( $\text{CDCl}_3$ , 75 MHz):  $\delta$  162.9, 155.0, 150.4, 129.6, 124.1, 119.1, 103.8, 52.6.

### Ethyl 2-(phenylsulfanyl)acrylate (10)

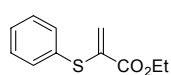

This compound was prepared from thiophenol according to general procedure A. The yield was 26 mg (53%). Analytical data agreed with those reported in literature.<sup>4</sup>  $^1\text{H}$ -NMR ( $\text{CDCl}_3$ , 300 MHz):  $\delta$  7.45-7.27 (m, 5H), 6.31 (s, 1H), 5.24 (s, 1H), 4.25 (q,  $J$  = 7.1

Hz, 2H), 1.27 (t,  $J = 7.1$  Hz, 3H).  $^{13}\text{C}$ -NMR ( $\text{CDCl}_3$ , 75 MHz):  $\delta$  163.9, 138.7, 133.9, 132.8, 129.4, 128.6, 122.3, 61.9, 14.3.

### Ethyl 2-(2-vinylphenoxy)acrylate (13)

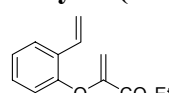

This compound was prepared from 2-vinylphenol according to general procedure A. The yield was 35 mg (61%).  $^1\text{H}$ -NMR ( $\text{CDCl}_3$ , 300 MHz):  $\delta$  7.57 (d,  $J = 7.5$  Hz, 1H), 7.27-7.12 (m, 2H), 6.98-6.83 (m, 2H), 5.77 (dd,  $J = 1.1, 17.7$  Hz, 1H), 5.57 (d,  $J = 2.1$  Hz, 1H), 5.29 (dd,  $J = 1.1, 11.0$  Hz, 1H), 4.63 (d,  $J = 2.1$  Hz, 1H), 4.30 (q,  $J = 7.2$  Hz, 2H), 1.32 (t,  $J = 7.2$  Hz, 3H).  $^{13}\text{C}$ -NMR ( $\text{CDCl}_3$ , 75 MHz):  $\delta$  162.3, 151.7, 150.8, 130.4, 129.5, 128.8, 126.4, 124.8, 120.2, 115.5, 101.8, 61.7, 14.4. HRMS ( $\text{EI}^+$ ): calculated for  $\text{C}_{13}\text{H}_{14}\text{O}_3$ ,  $[\text{M}]^+$ : 218.0943, found: 218.0943.

### Ethyl 2-(2-allylphenoxy)acrylate (14)

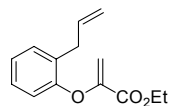

This compound was prepared from 2-allylphenol according to general procedure A. The yield was 7.13 g (78%).  $^1\text{H}$ -NMR ( $\text{CDCl}_3$ , 300 MHz):  $\delta$  7.26-7.08 (m, 3H), 6.95 (dd,  $J = 1.4, 7.8$  Hz, 1H), 5.94 (m, 1H), 5.57 (d,  $J = 2.1$  Hz, 1H), 5.07 (m, 2H), 4.66 (d,  $J = 2.1$  Hz, 1H), 4.30 (q,  $J = 7.1$  Hz, 2H), 3.36 (d,  $J = 6.7$  Hz, 2H), 1.32 (t,  $J = 7.1$  Hz, 3H).  $^{13}\text{C}$ -NMR ( $\text{CDCl}_3$ , 75 MHz):  $\delta$  162.3, 152.4, 150.7, 136.0, 131.5, 130.3, 127.4, 124.7, 119.7, 116.0, 101.5, 61.6, 34.1, 14.4. HRMS ( $\text{EI}^+$ ): calculated for  $\text{C}_{14}\text{H}_{16}\text{O}_3$ ,  $[\text{M}]^+$ : 232.1100, found: 232.1099.

### Ethyl benzofuran-2-carboxylate (15)

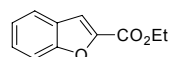

To a solution of **13** (18.5 mg, 84.8  $\mu\text{mol}$ ) in toluene (3 mL) was added 5 mol% of (IMes)(PCy<sub>3</sub>)Cl<sub>2</sub>Ru=CHPh (**A**). The reaction was stirred under an inert atmosphere at 70 °C for 30 min, followed by removal of the solvent *in vacuo*. The product was purified by column chromatography (EtOAc/heptane, 1:20). The yield was 14.3 mg (89%). Analytical data agreed with those reported in literature.<sup>5</sup>  $^1\text{H}$ -NMR ( $\text{CDCl}_3$ , 300 MHz):  $\delta$  7.69-7.27 (m, 5H), 4.44 (q,  $J = 6.9$  Hz, 2H), 1.42 (t,  $J = 6.9$  Hz, 3H).  $^{13}\text{C}$ -NMR ( $\text{CDCl}_3$ , 75 MHz):  $\delta$  159.3, 155.4, 145.5, 127.3, 126.8, 123.6, 122.6, 113.6, 112.2, 61.6, 14.6.

### Ethyl 4H-2-chromenecarboxylate (16)

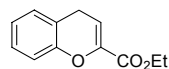

To a solution of **14** (29.7 mg, 128  $\mu\text{mol}$ ) in toluene (4 mL) was added 5 mol% of (IMes)(PCy<sub>3</sub>)Cl<sub>2</sub>Ru=CHPh (**A**). The reaction was stirred under an inert atmosphere at 70 °C for 30 min, followed by removal of the solvent *in vacuo*. The product was purified by column chromatography (EtOAc/heptane, 1:20). The yield was 24.0 mg (92%).  $^1\text{H}$ -NMR ( $\text{CDCl}_3$ , 300 MHz):  $\delta$  7.17-6.96 (m, 4H), 6.22 (t,  $J = 4.1$  Hz, 1H), 4.30 (q,  $J = 7.1$  Hz, 2H), 3.55 (d,  $J = 4.1$  Hz, 2H), 1.35 (t,  $J = 7.1$  Hz, 3H).  $^{13}\text{C}$ -NMR ( $\text{CDCl}_3$ , 75 MHz):  $\delta$  161.3, 150.8, 141.5, 128.7, 127.7, 123.7, 118.0, 116.9, 110.0, 61.4, 24.7, 14.4. HRMS ( $\text{EI}^+$ ): calculated for  $\text{C}_{12}\text{H}_{12}\text{O}_3$ ,  $[\text{M}]^+$ : 204.0787, found: 204.0787.

### (2R,3R,4R)-1,3,4-Tris(benzyloxy)hex-5-en-2-ol (21)

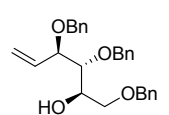

This compound was synthesized according to known procedures, analytical data agreed with those reported in literature.<sup>6</sup> The yield was 856 mg (86%).  $^1\text{H}$ -NMR ( $\text{CDCl}_3$ , 300 MHz):  $\delta$  7.38-7.23 (m, 15H), 6.00-5.89 (m, 1H), 5.30 (m, 2H), 4.53 (m, 4H), 4.40 (d<sub>AB</sub>,  $J = 12.0$  Hz, 2H), 4.07 (dd,  $J = 3.9, 7.2$  Hz, 1H), 4.00 (m, 1H), 3.52 (m, 3H), 2.82 (d,  $J = 4.9$  Hz, 1H).  $^{13}\text{C}$ -NMR ( $\text{CDCl}_3$ , 75 MHz):  $\delta$  138.0, 137.9, 137.6, 134.9, 128.2 (2), 128.1, 127.9 (2), 127.7, 127.5, 127.4, 118.8, 80.5, 80.2, 74.1, 73.4, 70.9, 70.7, 70.4.

### (2R,3R,4S)-1,3,4-Tris(benzyloxy)hex-5-en-2-ol (22)

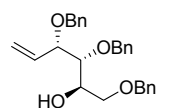

This compound was synthesized according to known procedures, analytical data agreed with those reported in literature.<sup>7</sup> The yield was 180 mg (28%).  $^1\text{H}$  NMR ( $\text{CDCl}_3$ , 300 MHz):  $\delta$  7.31-7.17 (m, 15H), 5.99-5.87 (m, 1H), 5.34 (m, 2H), 4.64-4.48 (m, 4H), 4.57 (d<sub>AB</sub>,  $J = 11.7$  Hz, 2H), 4.14 (dd,  $J = 3.9, 7.8$  Hz, 1H), 3.87-3.78 (m, 1H), 3.70 (m, 1H),

3.61 (m, 2H), 2.67 (d,  $J = 4.8$  Hz, 1H).  $^{13}\text{C}$  NMR ( $\text{CDCl}_3$ , 75 MHz):  $\delta$  138.2(2), 137.8, 134.9, 128.2, 128.1(3), 127.9, 127.6, 127.5, 127.4(2), 127.3, 119.5, 82.0, 80.9, 74.1, 73.4, 70.8, 70.4.

**(2R,3S,4R)-1,3,4-Tris(benzyloxy)hex-5-en-2-ol (23)**

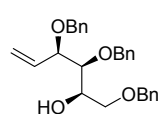

This compound was synthesized according to known procedures, analytical data agreed with those reported in literature.<sup>8</sup> The yield was 281 mg (46%).  $^1\text{H}$  NMR ( $\text{CDCl}_3$ , 300 MHz):  $\delta$  7.35-7.18 (m, 15H), 5.96 (m, 1H), 5.36 (m, 2H), 4.70-4.52 (m, 4H), 4.52 (d<sub>AB</sub>,  $J = 11.5$  Hz, 2H), 4.09 (dd,  $J = 3.9, 7.8$  Hz, 1H), 3.77-3.57 (m, 4H), 2.83 (br d,  $J = 5.7$  Hz).  $^{13}\text{C}$  NMR ( $\text{CDCl}_3$ , 75 MHz):  $\delta$  138.2, 138.0(2), 135.4, 128.2(2), 128.1(2), 127.8, 127.5(3), 127.4, 119.5, 81.4, 80.6, 79.6, 74.4, 73.2, 71.1, 70.3.

**(2R,3S,4S)-1,3,4-Tris(benzyloxy)hex-5-en-2-ol (24)**

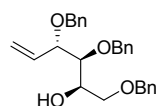

This compound was synthesized according to known procedures, analytical data agreed with those reported in literature.<sup>6</sup> The yield was 271 mg (75%).  $^1\text{H}$  NMR ( $\text{CDCl}_3$ , 300 MHz):  $\delta$  7.31-7.16 (m, 15H), 5.85 (m, 1H), 5.35 (m, 2H), 4.63-4.39 (m, 4H), 4.61 (d<sub>AB</sub>,  $J = 11.4$  Hz, 2H), 4.08 (dd,  $J = 6.6, 7.5$  Hz, 1H), 3.91 (m, 1H), 3.60 (dd,  $J = 2.6, 6.5$  Hz, 1H), 3.41 (dd,  $J = 3.3, 6.0$  Hz, 2H), 2.42 (d,  $J = 6.8$  Hz, 1H).  $^{13}\text{C}$  NMR ( $\text{CDCl}_3$ , 75 MHz):  $\delta$  138.1(2), 137.8, 135.0, 128.2, 128.1, 128.0(2), 127.7(2), 127.6, 127.5, 127.3, 119.2, 82.1, 80.2, 75.0, 73.3, 71.2, 70.7, 70.0.

**((2R,3R,4S,E)-2-Methoxy-6-phenylhex-5-ene-1,3,4-triyl)tris(oxy)tris(methylene)-tribenzene (36)**

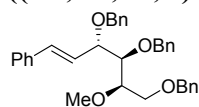

To a solution of **35**<sup>9</sup> (4.4 mg, 10.2  $\mu\text{mol}$ ) in toluene (1 mL) was added (IMes)(PCy<sub>3</sub>)Cl<sub>2</sub>Ru=CHPh (**A**, 8.7 mg, 1.0 equiv) and the mixture was stirred under an inert atmosphere at 80 °C for 18 h. The reaction was exposed to air and the solvent was removed *in vacuo*. The product was purified by column chromatography (EtOAc/heptane, 1:10). The isolated yield of **36** was 74%.  $^1\text{H}$ -NMR ( $\text{CDCl}_3$ , 300 MHz):  $\delta$  7.40-7.23 (m, 20H), 6.61 (d,  $J = 16.2$  Hz, 1H), 6.19 (dd,  $J = 8.2, 16.2$  Hz), 4.88-4.61 (m, 3H), 4.39 (m, 3H), 4.27 (m, 1H), 3.71 (d,  $J = 6.2$  Hz, 1H), 3.53 (m, 3H), 3.38 (s, 3H).  $^{13}\text{C}$ -NMR ( $\text{CDCl}_3$ , 75 MHz):  $\delta$  138.8, 138.5, 138.1, 136.5, 133.7, 128.6, 128.5, 128.3 (2), 128.2, 128.0, 127.9, 127.8, 127.6, 127.5, 127.1, 126.6, 81.9, 81.5, 80.1, 75.3, 73.3, 70.7, 69.2.  $[\alpha]^{22}_{\text{D}} = +10.3$  ( $c$  0.3,  $\text{CHCl}_3$ ). HRMS ( $\text{CI}^+$ ): calculated for C<sub>34</sub>H<sub>37</sub>O<sub>4</sub>,  $[\text{M}^+ + \text{H}]$ : 509.2692, found: 509.2708.

**(2R,4R,5S,6R)-Methyl 4,5-di(benzyloxy)-6-[(benzyloxy)methyl]tetrahydro-2H-pyran-2-carboxylate (37)**

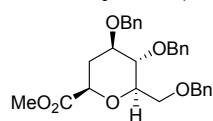

A solution of **29a** (63 mg, 0.129 mmol) in EtOAc/MeOH/Et<sub>3</sub>N (50:50:1; 10 ml) was treated with 10% Pd/C (20 mg) and H<sub>2</sub> (1 atm) for 1 h. The mixture was filtered over Celite, concentrated *in vacuo* and the product was purified by column chromatography (EtOAc/heptane, 1:4). The yield was 60 mg (95%). The analytical data agreed with those reported in literature.<sup>10</sup>  $^1\text{H}$ -NMR ( $\text{CDCl}_3$ , 300 MHz):  $\delta$  7.36-7.17 (m, 15H), 4.90-4.53 (m, 6H), 4.01 (dd,  $J = 2.0, 12.1$  Hz, 1H), 3.80 (s, 3H), 3.78-3.65 (m, 3H), 3.55-3.45 (m, 2H), 2.49 (ddd,  $J = 2.0, 4.9, 12.8$  Hz, 1H), 1.71 (q,  $J = 12.2$  Hz, 1H).  $^{13}\text{C}$ -NMR ( $\text{CDCl}_3$ , 75 MHz):  $\delta$  170.0, 138.0, 128.2, 128.1 (2), 127.8, 127.7, 127.5 (2), 127.4, 127.3, 80.5, 79.3, 77.8, 75.1, 74.4, 73.4, 71.5, 69.1, 52.4, 34.0.  $[\alpha]^{22}_{\text{D}} = +10.6$  ( $c$  0.5,  $\text{CH}_2\text{Cl}_2$ ).

**References for experimental section:**

- (1) Bettach, N.; Le Bigot, Y.; Mouloungui, Z.; Delmas, M.; Gaset, A. *Synth. Commun.* **1992**, 22, 513.

- (2) Hekking, K. F. W.; van Delft, F. L.; Rutjes, F. P. J. T. *Tetrahedron* **2003**, 59, 6751.
- (3) Campbell, M.; McLeish, M. J.; Lynch, D. E.; Smith, G.; Byriel, K. A.; Kennard, C. H. L. *Aust. J. Chem.* **1992**, 45, 2061.
- (4) Monteiro, H.J., Gemal, A.L. *Synthesis* **1975**, 7, 437.
- (5) Ashram, M. *J. Chem. Soc. Perkin Trans. 2* **2002**, 10, 1662.
- (6) Pearson, W. H.; Hines, J. V. *J. Org. Chem.* **2000**, 65, 5785.
- (7) Freeman, F.; Robarge, K. D. *Carbohydr. Res.* **1986**, 154, 270.
- (8) Postema, M. H. D.; Calimente, D.; Liu, L.; Behrmann, T. L. *J. Org. Chem.* **2000**, 65, 6061.
- (9) Compound **35** was synthesized by reacting **28** with NaH and MeI in DMF.
- (10) Barnes, N. J.; Probert, M. A.; Wightman, R. H. *J. Chem. Soc. Perkin Trans. 1* **1996**, 431.

# NMR spectra

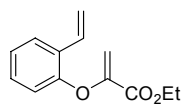

13

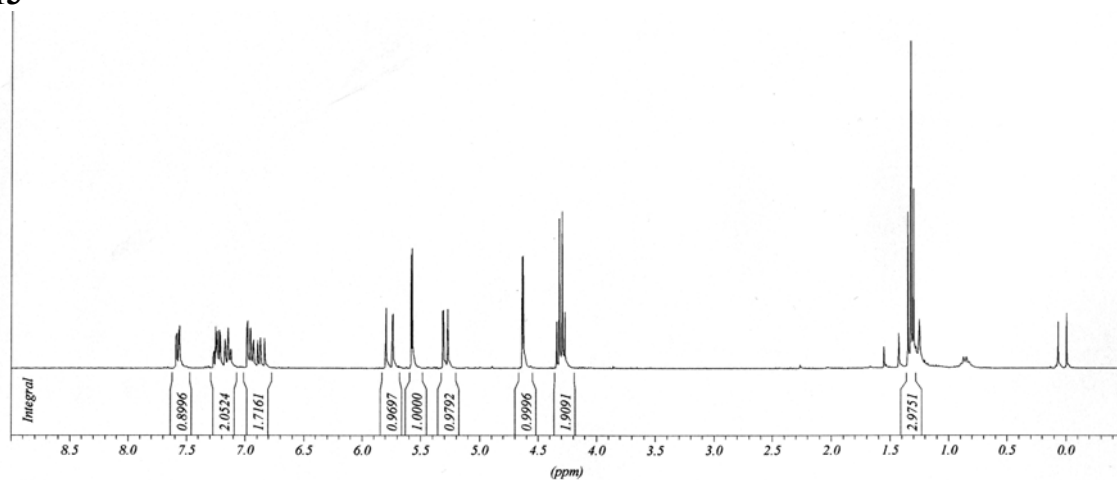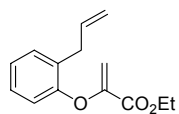

14

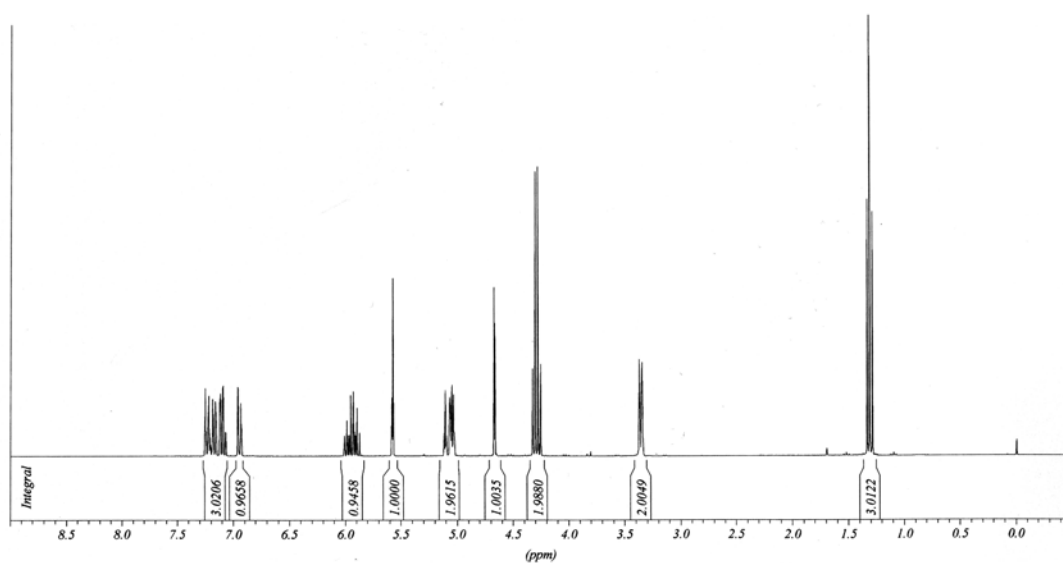

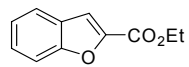

15

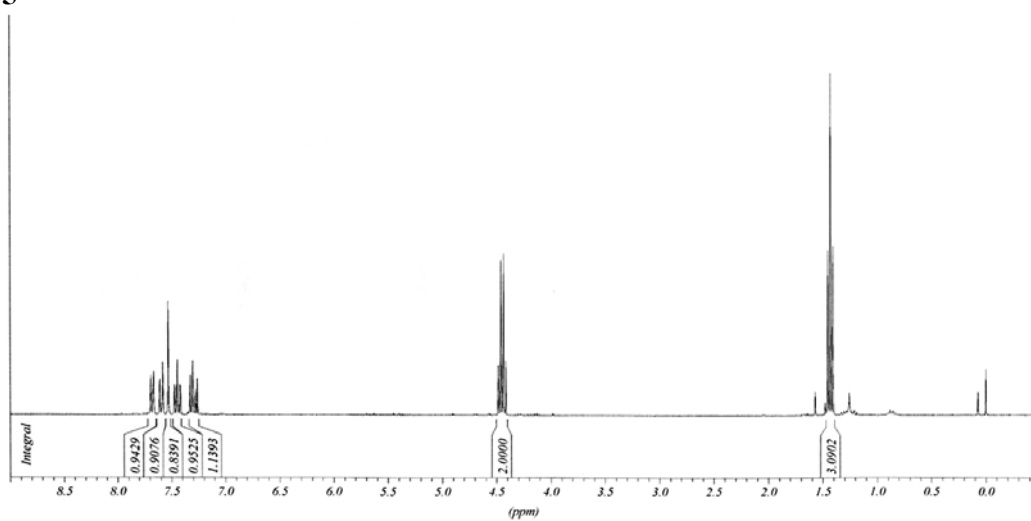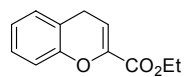

16

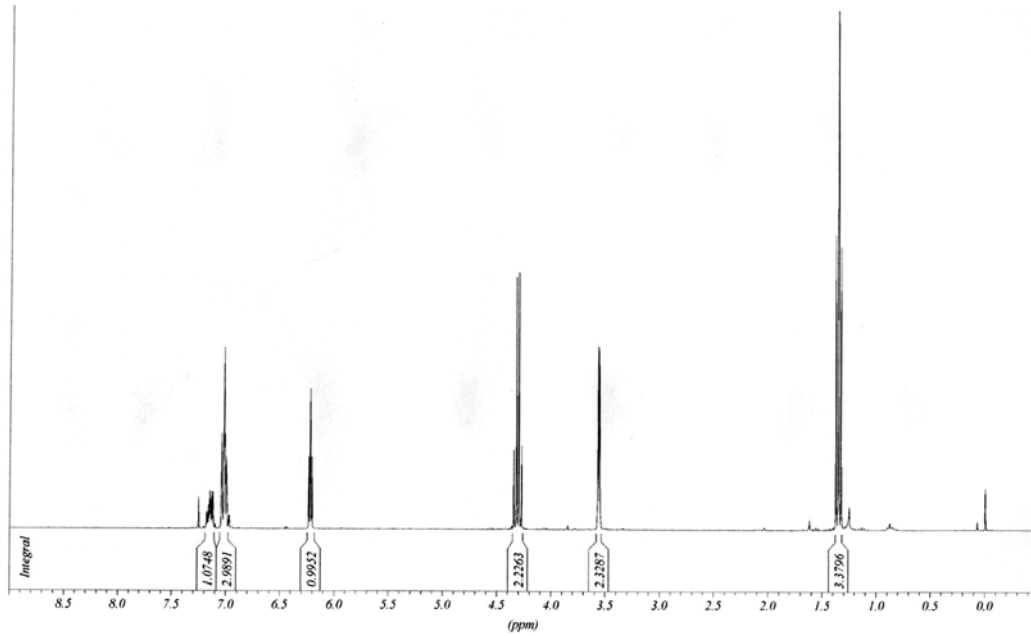

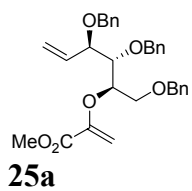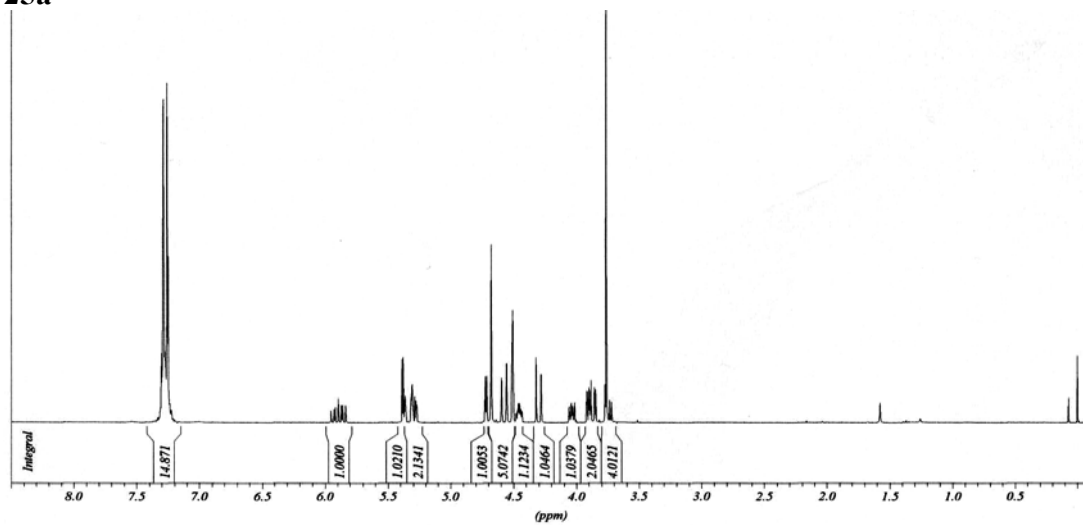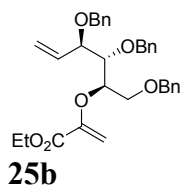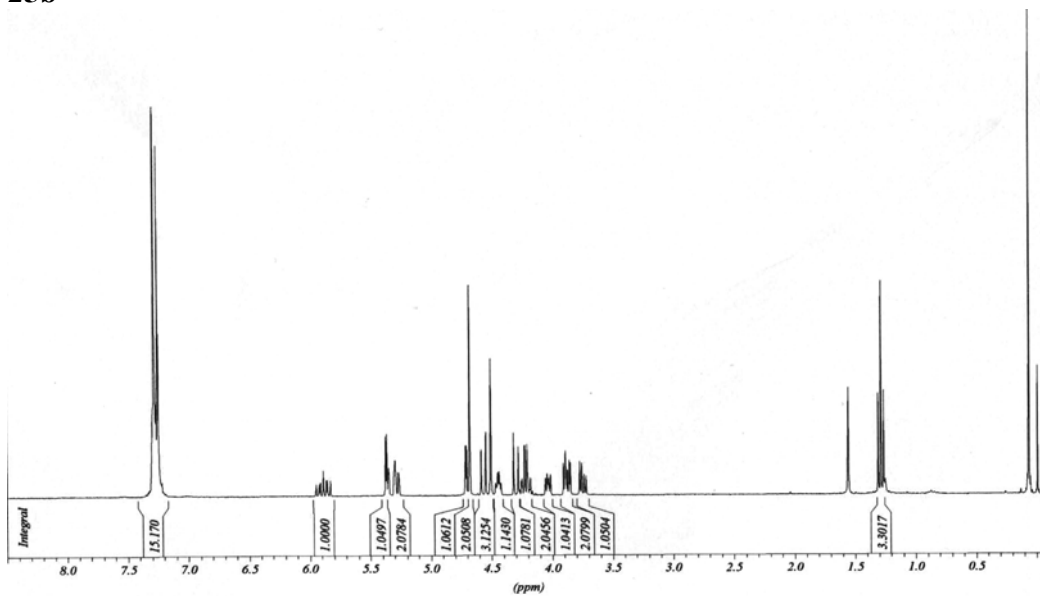



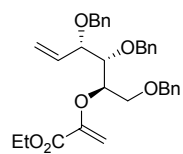

26

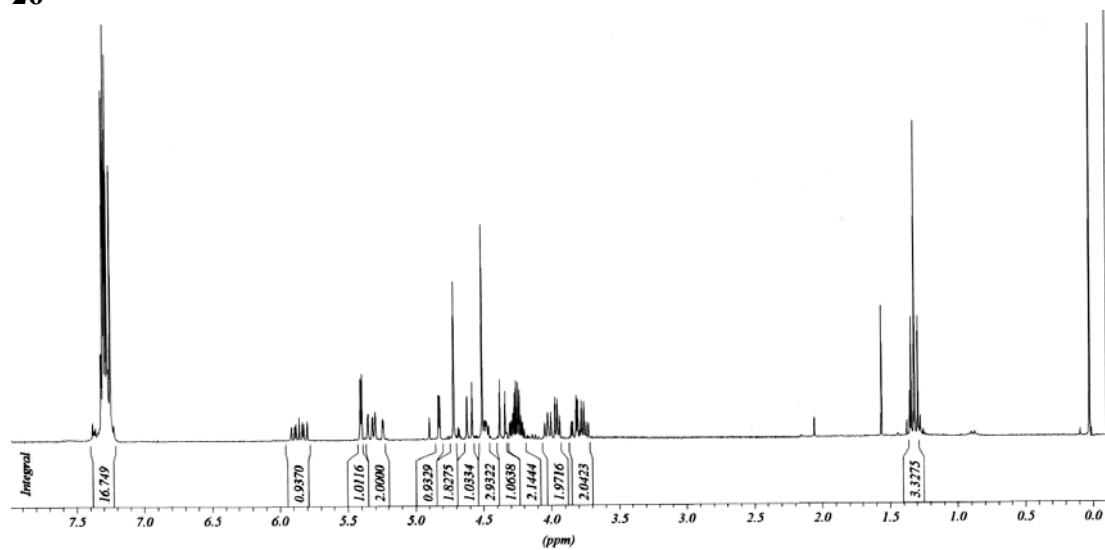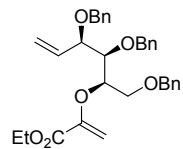

27

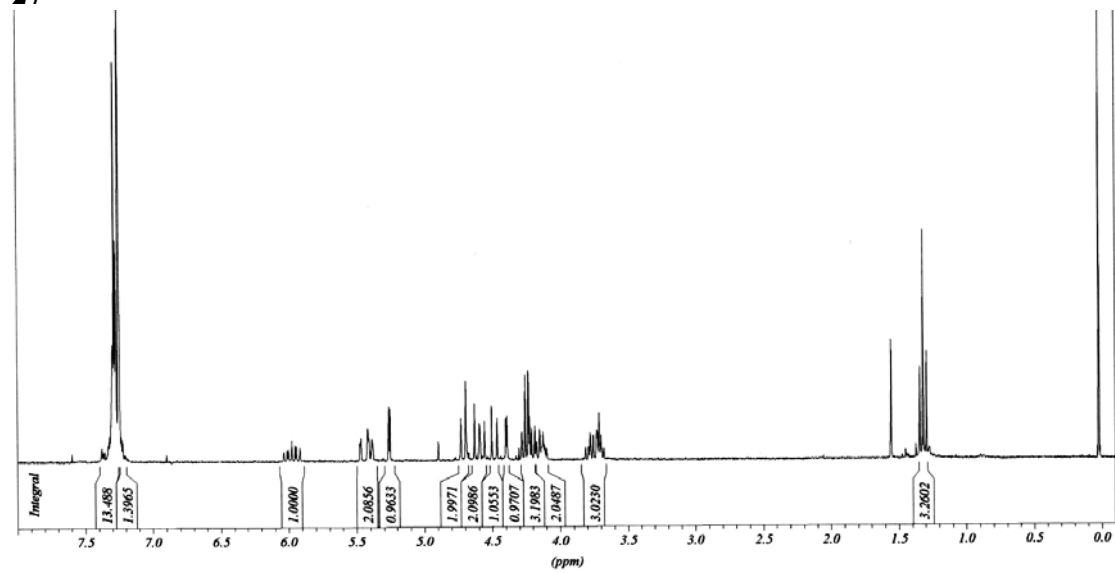

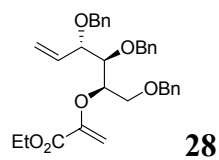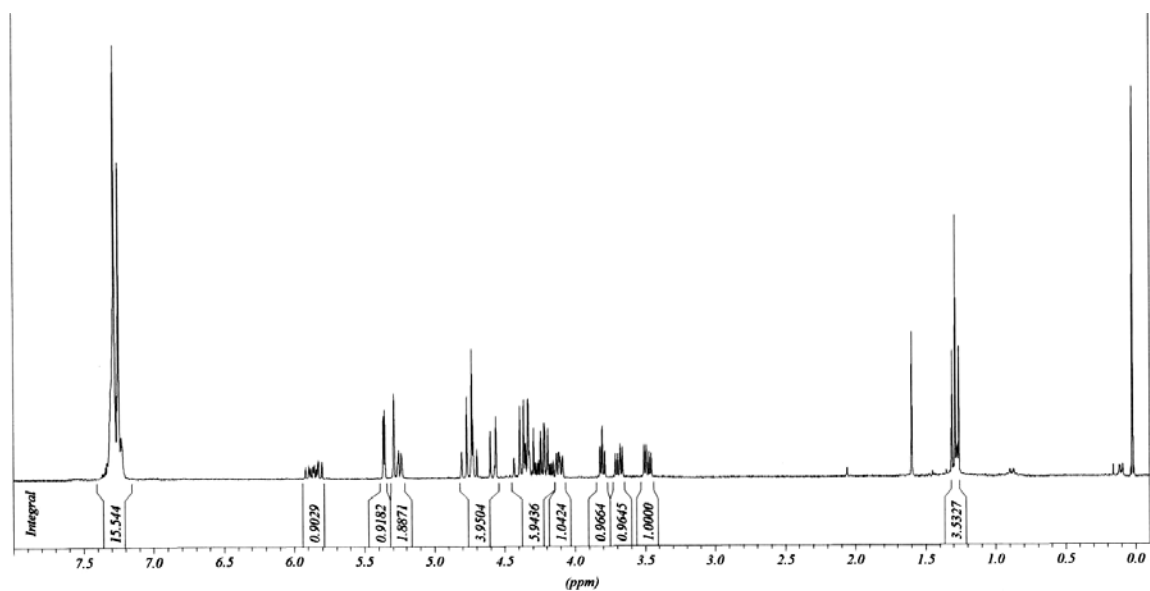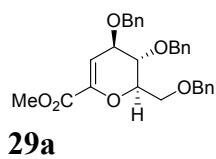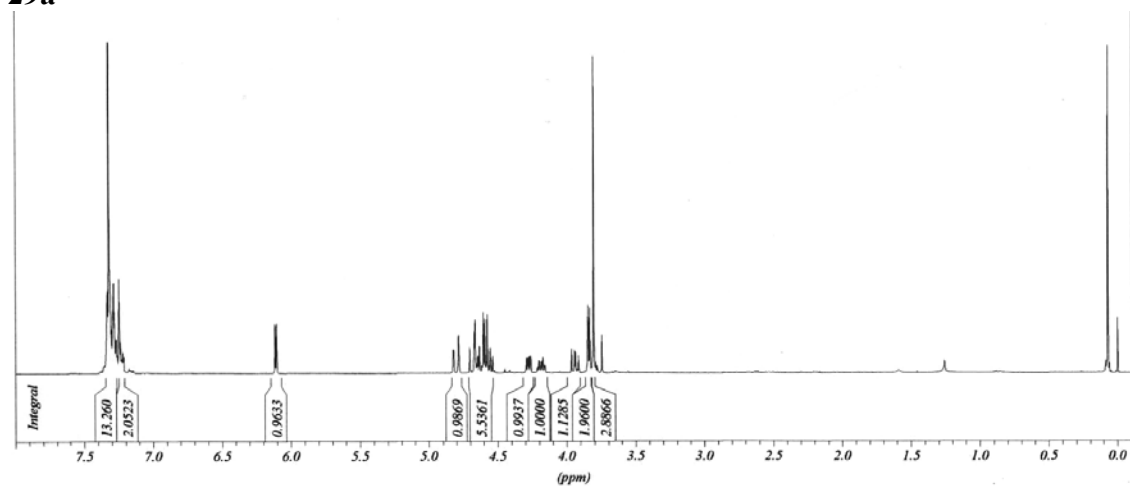

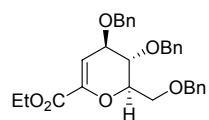

**29b**

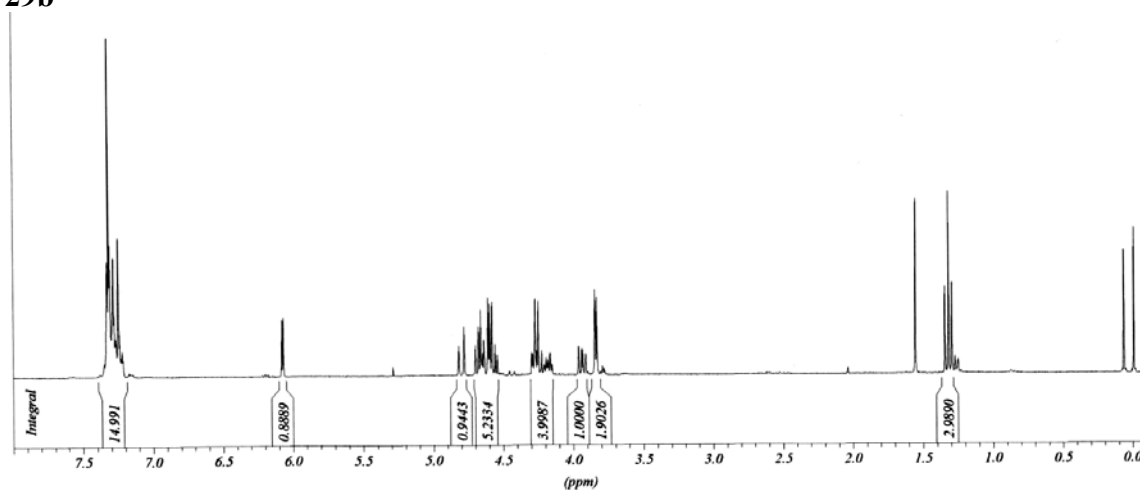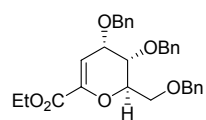

**30**

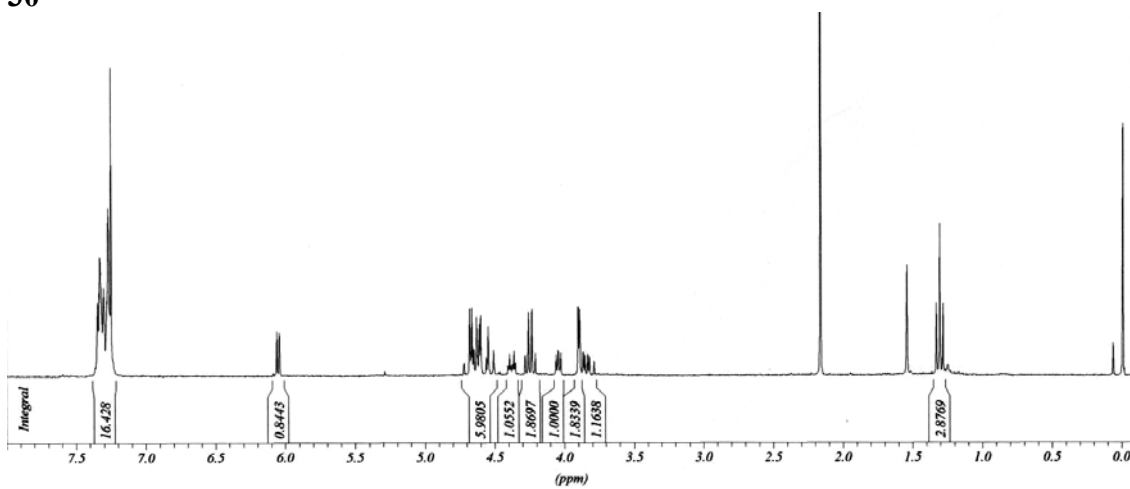

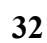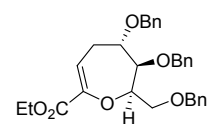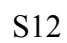

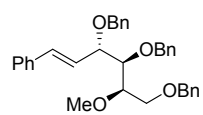

36

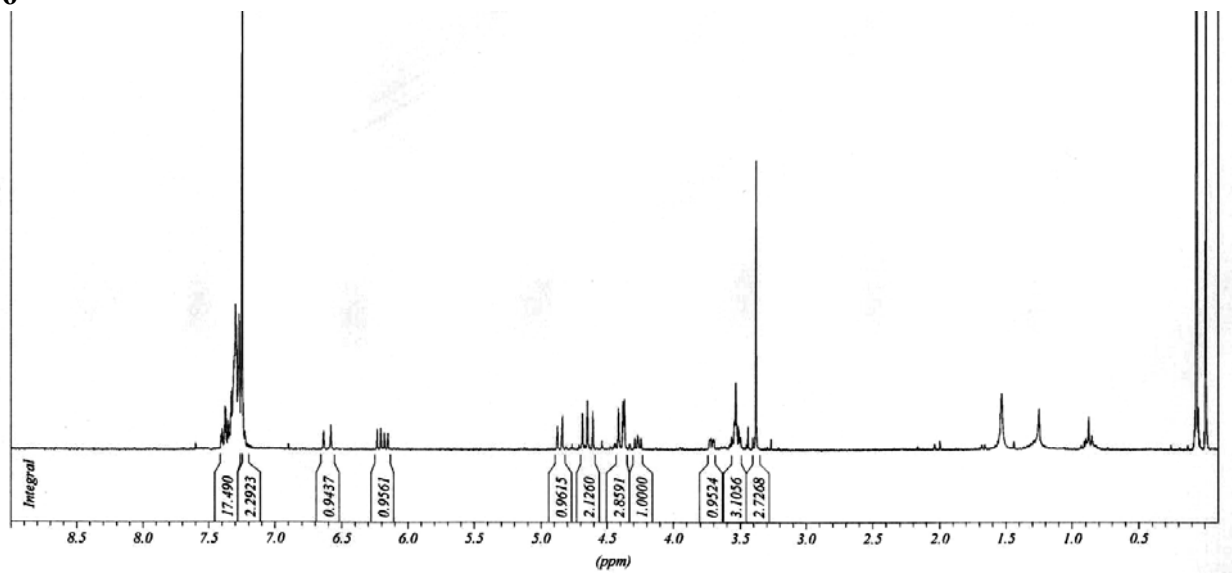

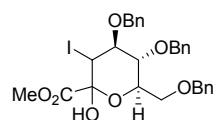

38

*first diastereoisomer*

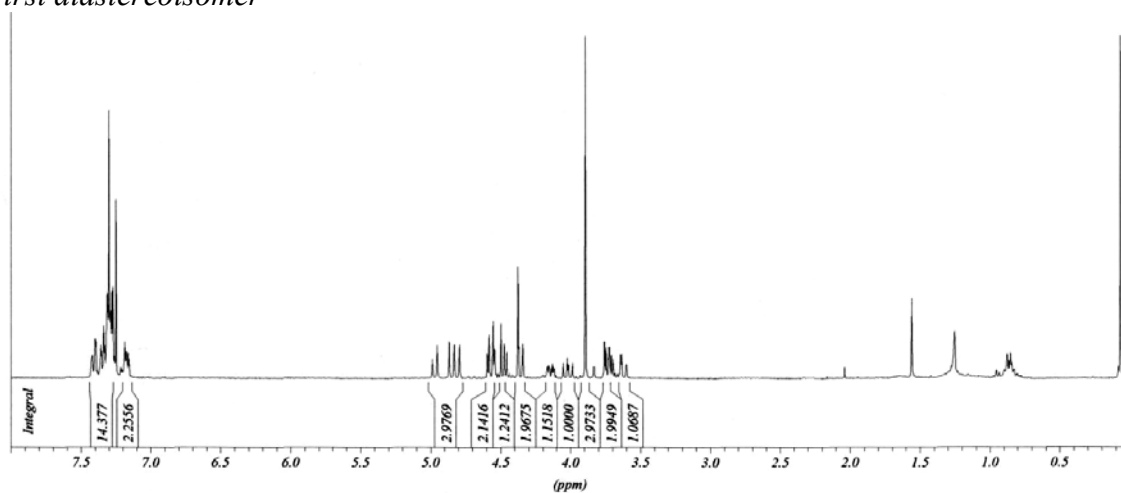

*second diastereoisomer:*

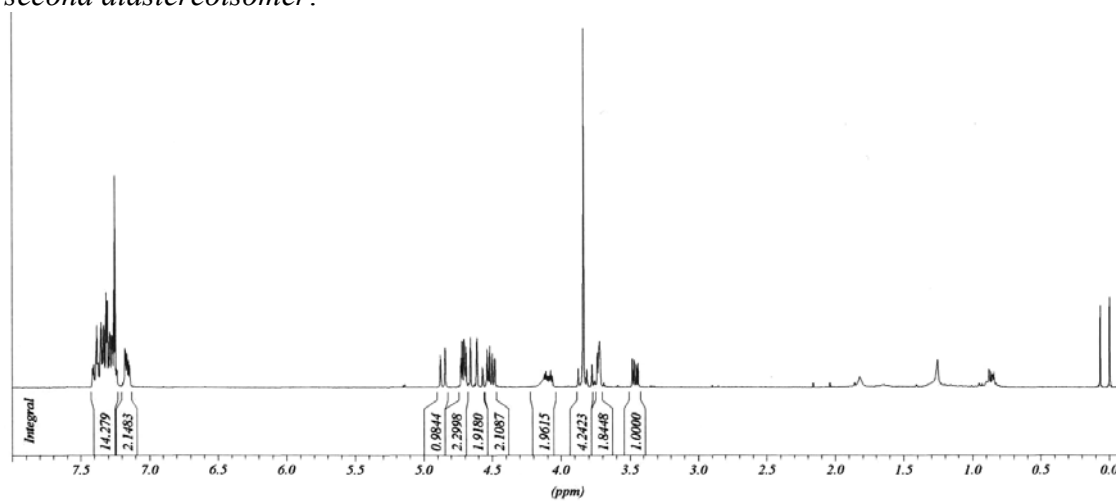

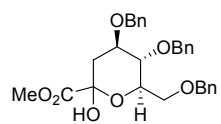

39

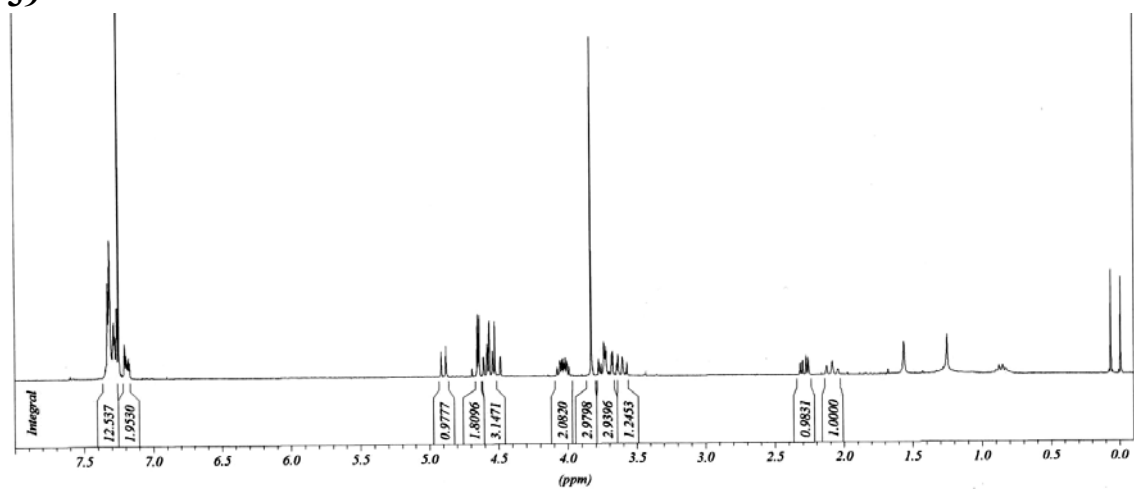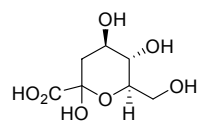

1

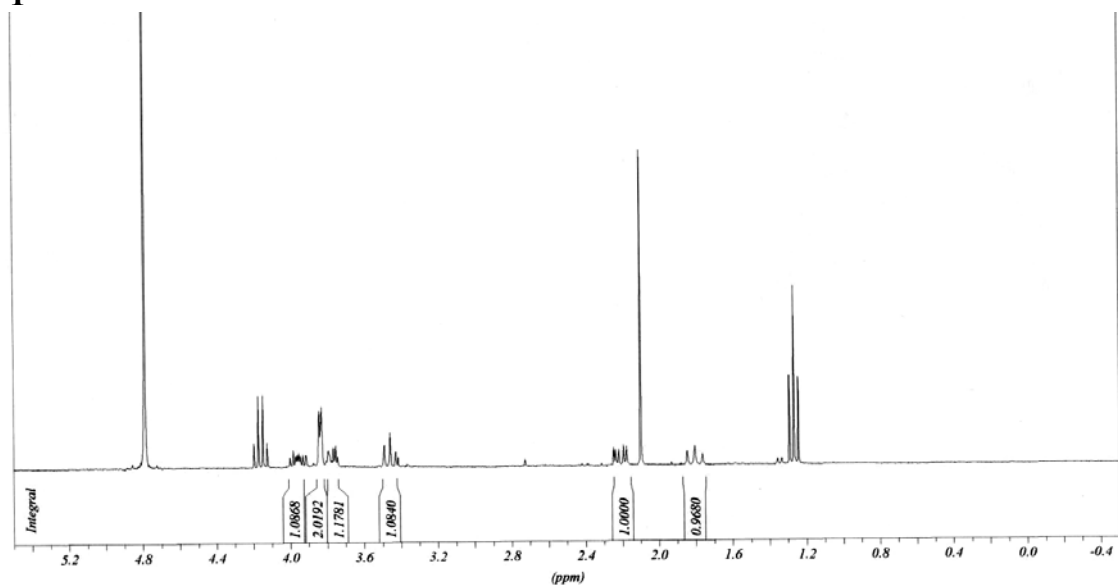

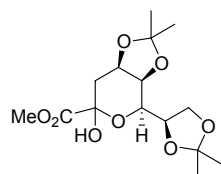

41

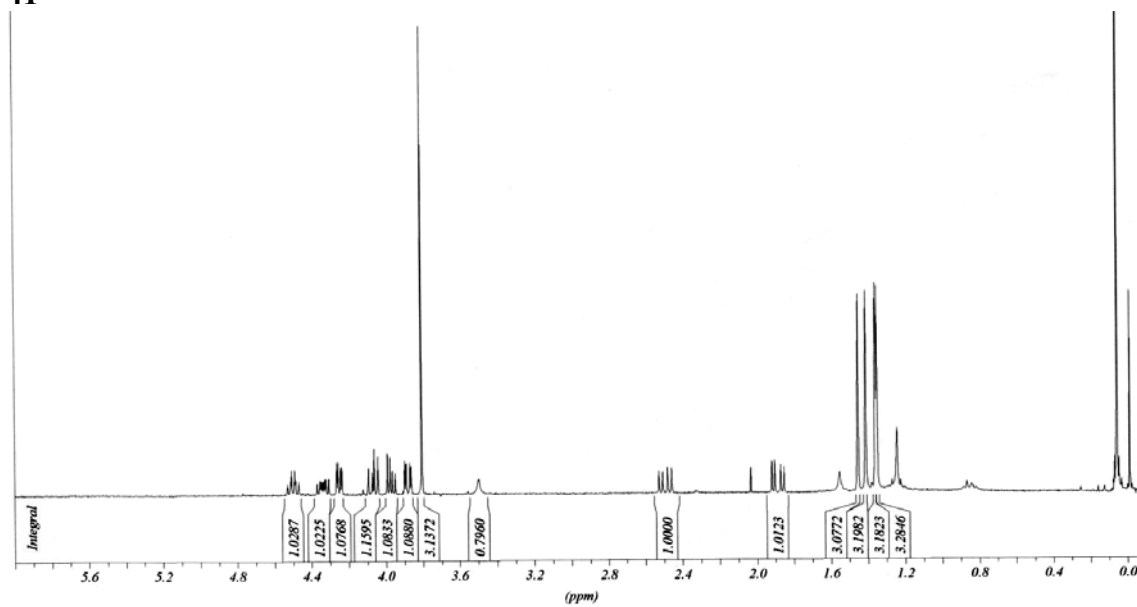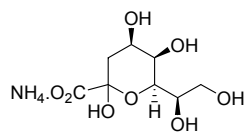

2.NH<sub>3</sub>

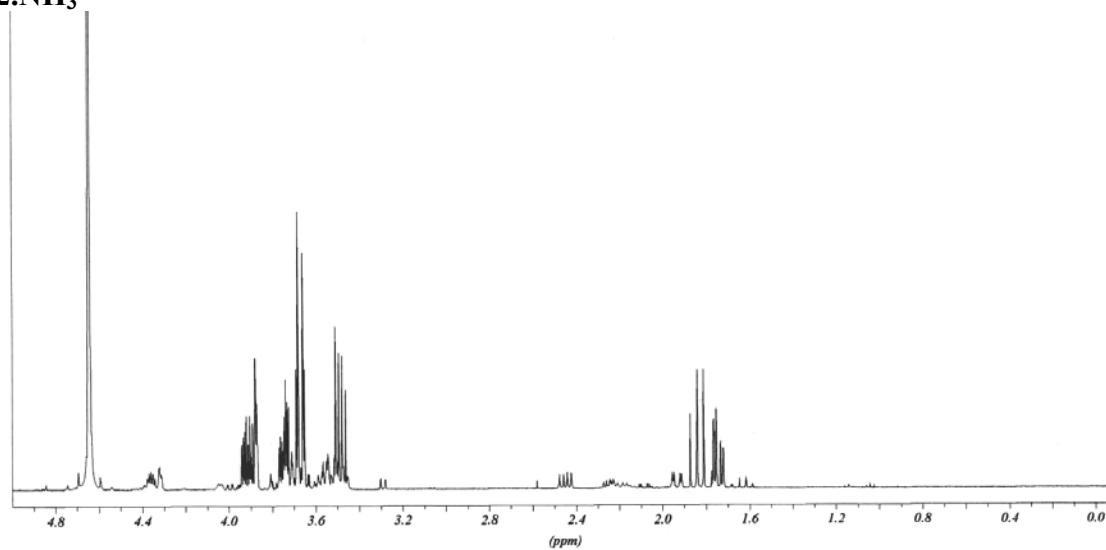

Supplement: Supplementary file 1 [file 4770121]
